# Supplementary material for: Kinetic control in the synthesis of highly conductive solution-processable PEDOTs
Source: Royal Society of Chemistry journal article supplement (doi:10.1039/d4py00220b), 2024-01-01
Supplement: d4py00220b1.pdf [file d4py00220b1.pdf]

## Supplementary Information

### **Kinetic control in the synthesis of highly conductive solution-processable PEDOTs**

Ziyi Guo <sup>‡a</sup>, Jingming Tang <sup>‡a</sup>, Jingyuan Yao <sup>a</sup> and Yuda Li <sup>a\*</sup>

<sup>a</sup> Key Laboratory for Green Process of Ministry of Education, Key Laboratory of Novel Biomass-based Environmental and Energy Materials in Petroleum and Chemical Industry, School of Chemical Engineering and Pharmacy, Wuhan Institute of Technology, Wuhan, Hubei 430205, China.

<sup>‡</sup> Ziyi Guo and Jingming Tang contributed equal to this work.

\*Corresponding authors: E-mail: psydli@wit.edu.cn

## **1. Experimental Section**

### **1.1 Materials**

PSS with  $M_w$  of 200 KDa was purchased from Sigma-Aldrich. EDOT monomer was purchased from Sinopharm Chemical. APS,  $FeCl_3$ , EG, ethanediamine reducing agent and organic solvents including acetone, ethanol were purchased from Sinopharm Chemical and used without further purification.

### **1.2 Synthesis of LOC PEDOT:PSSs**

The LOC PEDOT:PSSs were prepared through the oxidative polymerization of EDOT monomer in an aqueous solution containing PSS.

A typical protocol for the synthesis of LOC1 PEDOT:PSS is as follows: The PSS powder was added to 30 mL of deionized water, followed by the addition of a mixture containing EDOT and EG (1:5) under slow stirring conditions for 60 minutes. The pH was then adjusted to 1. Subsequently, APS was added with high-speed stirring (800 rpm). The feed mass ratio of EDOT to PSS is 1:2, while the mole ratio of APS to EDOT is set at 1.5:1. The above mixture was stirred at room temperature for a duration of 24

h and subsequently subjected to dialysis using a membrane with a molecular weight cutoff of 1000 Da for a period of 5 days. Finally, the PEDOT aqueous dispersion was concentrated to a mass concentration of 1.3% through the process of rotary evaporation. By conducting the oxidative polymerization without the employment of EG, the LOC2 PEDOT:PSS product was obtained. The LOC3, LOC4, and LOC5 PEDOT:PSSs were prepared without the use of EG but instead utilizing  $\text{FeCl}_3$ .  $\text{FeCl}_3$  was introduced into the reaction system after the addition of APS. The  $\text{FeCl}_3$  quantities used for the synthesis of LOC3, LOC4, and LOC5 PEDOT:PSSs were 0.1 mol% eq., 1 mol% eq. and 20 mol% eq., respectively ( $\text{FeCl}_3$ :EDOT = 0.001:1, 0.01:1, 0.2:1).

### **1.3 Preparation of the samples for the UV-vis-NIR studies**

The mixture (0.2 mL) at a specific stage of the reaction was initially extracted and transferred into a dialysis bag with a  $M_w$  cut-off of 1000 KDa. Then, the extracted mixture underwent dialysis against an abundant supply of distilled water for a duration of three hours, with the water being refreshed every two minutes. As a result, the monomers, oxidizing agents, and salts were effectively eliminated, leading to the acquisition of a purified intermediate suitable for spectral analysis.

### **1.4 Reducing dedoping procedure**

To meet the requirements of  $M_w$  analysis, we performed a thorough reducing dedoping treatment on PEDOT intermediates. Specifically, the intermediates (0.3 mL) were initially introduced into 3 mL of a 10 M NaOH solution. Subsequently, 0.3 mL of a strong reducing agent, ethanediamine,<sup>[1]</sup> was added to the aforementioned solution. Following vigorous stirring at 1000 rpm for a duration of 30 minutes, the thoroughly reduced PEDOT (neutral PEDOT) was successfully obtained.

### **1.5 $\text{H}_2\text{SO}_4$ post-treatment process**

The initial step involves spin-coating PEDOT:PSS aqueous dispersions onto glass substrates at 2000 rpm for 60 s. The films were subsequently annealed on a hot plate under ambient atmosphere. Afterwards, the films were immersed in 98%  $\text{H}_2\text{SO}_4$  and then rinsed with DI water three times. Then, the films were annealed on a hot plate under ambient atmosphere. Next, the films were immersed in 98%  $\text{H}_2\text{SO}_4$  once again and rinsed with DI water three times. Finally, the films underwent new round of

annealing treatment.

## 1.6 Measurements and characterizations

UV-vis-NIR absorption spectra were recorded on a UV-3100 UV-VIS spectrophotometer. The HOMO and LUMO energies of thiophene oligomers were computed using Density Functional Theory (DFT) with the B3LYP functional and 6-311G(d,p) basis set as implemented in the Gaussian 09 software package. XPS tests were conducted on a Thermo Scientific ESCALAB 250Xi instrument. Raman spectra were recorded on a DXR Raman Microscope. AFM measurements were performed using Park XE-100 instrument. TEM measurements were performed on a Tecnai G<sup>2</sup> F30 S-Twin microscope. Electrical conductivities were measured by four-point probe method. Film thicknesses were measured with a Dektak150 step profiler.

## 2. Supplementary figures and tables

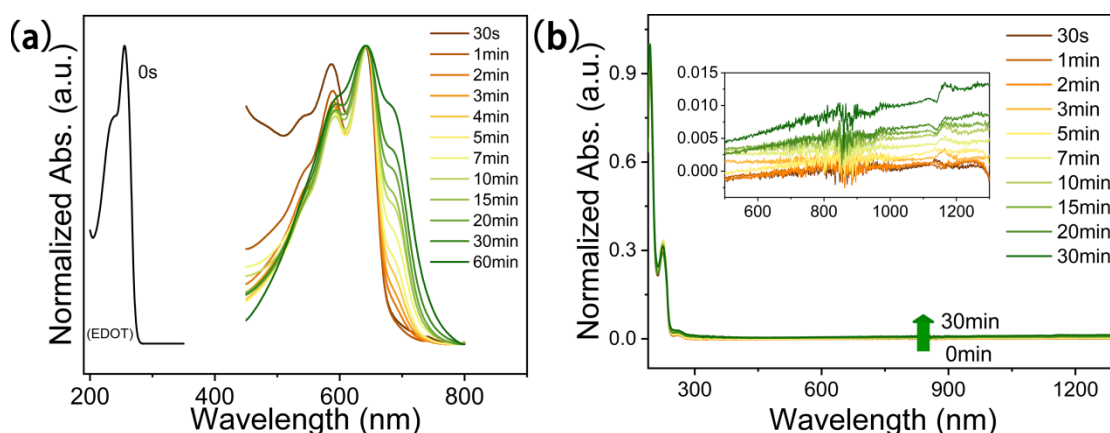

**Figure S1** (a) Visible absorption spectra of reaction intermediates during the early stages (0-60 min) after complete dedoping treatments. (b) UV-vis-NIR absorption spectra of the reaction mixtures extracted at early stages (0-60 min). Insert: Enlarged spectra of long-wavelength regions. It should be point out that the initial intermediates used for  $M_w$  analysis were not subjected any purification treatments, with the aim of preserving the potential generated oligomers with low  $M_w$ s. In contrast, the initial intermediates used for doping degree analysis underwent a rapid dialysis purification process to remove EDOT monomers, oxidizing agents, and salts.

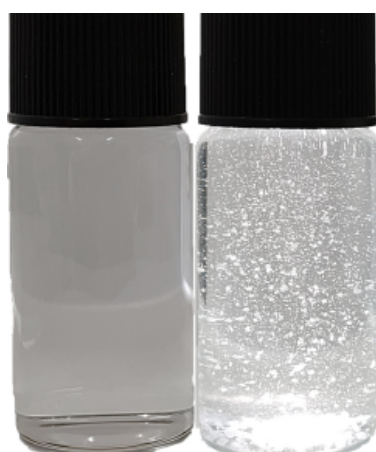

**Figure S2** Photographic demonstration of the dissolution cases involving 0.1 g of ammonium persulfate in 10 mL of water (left) and ethylene glycol (right).

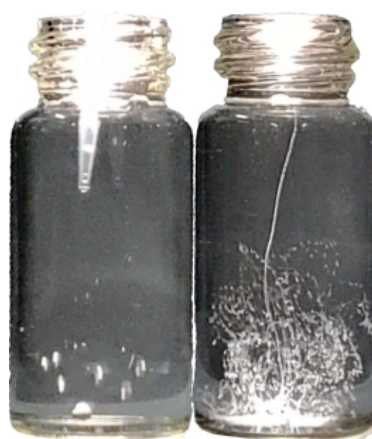

**Figure S3** Photographic demonstration of the droplets of neat EDOT and EDOT/EG mixture (v/v 1/5) in water.

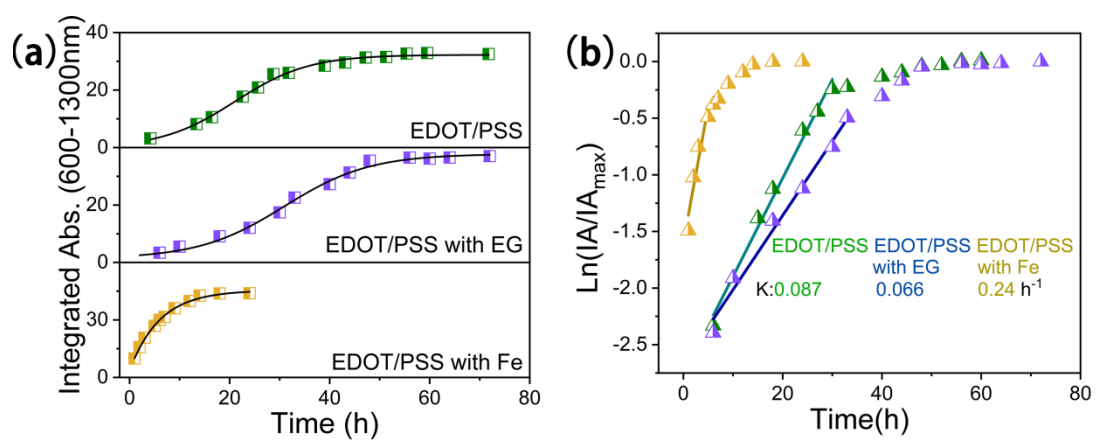

**Figure S4** (a) Temporal evolution of the integrated absorbance of polarons in **Fig. 1f, h, j** for various reaction systems. (b) Reaction kinetics for various reaction systems. The IA and  $IA_{\max}$  are the integrated absorbance of polarons between 700 and 1300 nm depicted **Fig. 1f, h, j** at a specific time and endpoint, respectively.

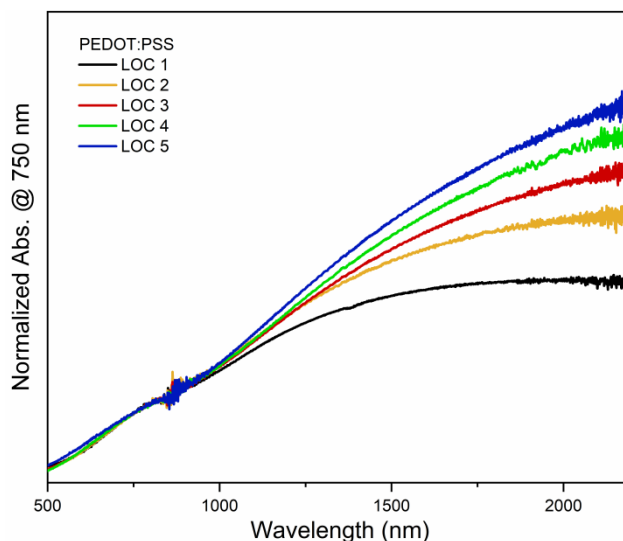

**Figure S5** Vis-NIR absorption spectra of various PEDOT:PSS films.

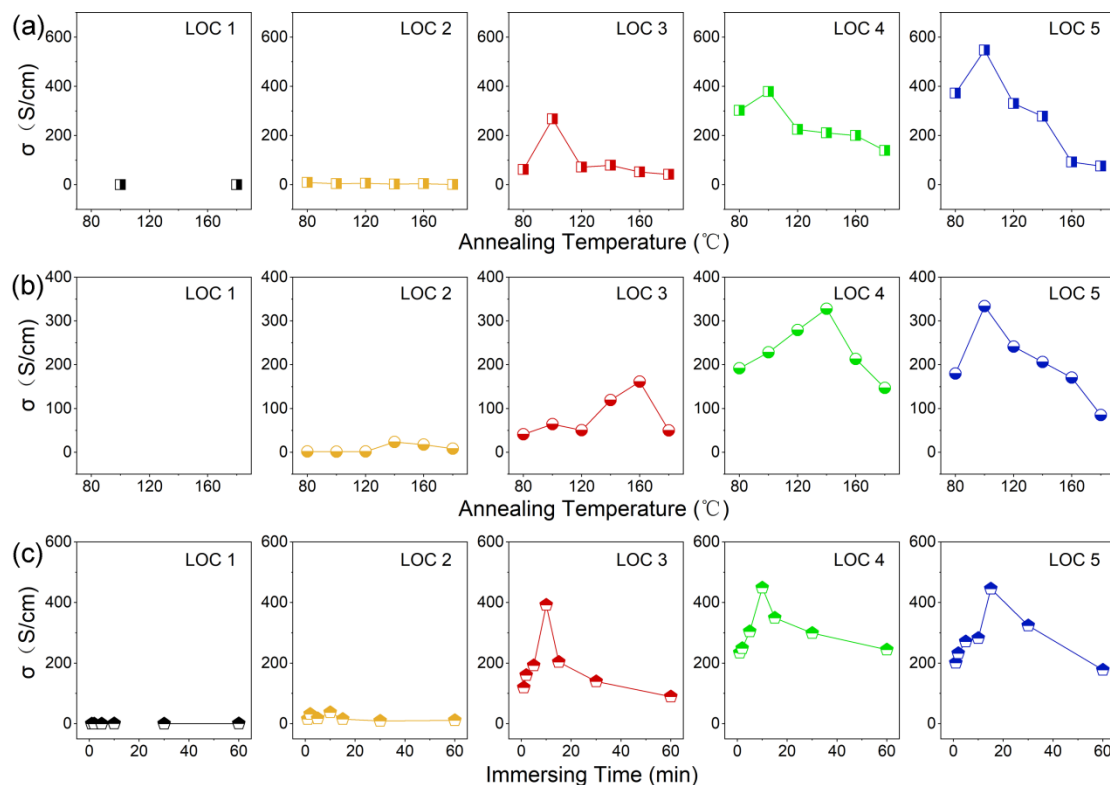

**Figure S6** Optimization of the  $H_2SO_4$  post-treatment process. Annealing temperatures

of PEDOT:PSS films prior to (a) and subsequent to (b)  $\text{H}_2\text{SO}_4$  post-treatment. (c) Immersion time in  $\text{H}_2\text{SO}_4$ .

### **3. Supplementary References**

[1] T. P. A. van der Pol, S. T. Keene, B. W. H. Saes, S. C. J. Meskers, A. Salleo, Y. van de Burgt and R. A. J. Janssen, *J. Phys. Chem. C*, 2019, 123, 24328–24337.
